# Supplementary material
Source: PubMed Central journal article supplement (PMC6463724)
Supplement: supp_RA118.006252_141300_2_supp_288284_pn4xyx.pdf [file supp_RA118.006252_141300_2_supp_288284_pn4xyx.pdf]

## Supporting Information for

# Comparison of multiple reported Amyloid- $\beta$ receptors for sufficiency, affinity, and Alzheimer's relevance

Levi M. Smith<sup>1,2</sup>, Mikhail A. Kostylev<sup>1</sup>, Suho Lee<sup>1</sup>, and Stephen M. Strittmatter<sup>1,\*</sup>

From the <sup>1</sup>Program in Cellular Neuroscience, Neurodegeneration & Repair, Departments of Neurology and of Neuroscience, Yale University School of Medicine, New Haven, CT 06536, USA, and  
<sup>2</sup>Department of Cell Biology, Yale University School of Medicine, New Haven, CT 06536, USA

\*To whom correspondence should be addressed: Stephen M. Strittmatter, CNNR Program, BCMM 436, Yale University School of Medicine, 295 Congress Avenue, New Haven, CT 06536, USA  
stephen.strittmatter@yale.edu

This PDF includes:

Figure S1

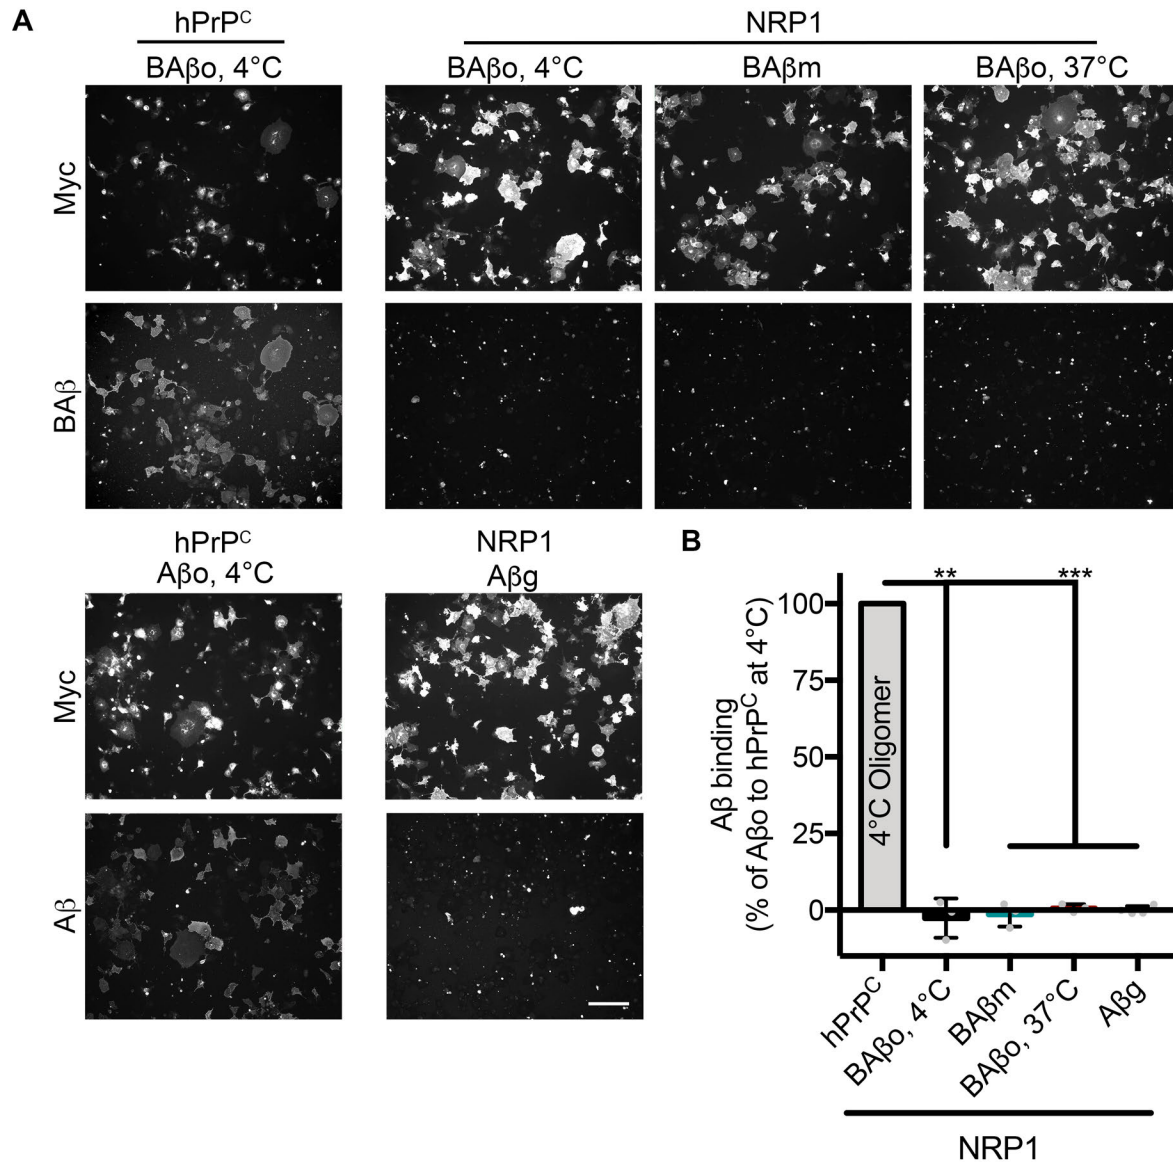

**Figure S1. Neuropilin-1 does not bind A $\beta$ , regardless of preparation.**

**A.** COS-7 cells expressing the indicated Myc-tagged protein and incubated with 1  $\mu$ M BA $\beta$ o, BA $\beta$ m, or A $\beta$ g at 4°C or BA $\beta$ o at 37°C. Scale bar = 200  $\mu$ m. BA $\beta$ o = biotinylated amyloid beta oligomers (o), monomers (m), or globulomers (g) **B.** Quantification of binding of different A $\beta$  preparations to NRP1-expressing cells relative to BA $\beta$ o (or A $\beta$ o for globulomer) binding to Myc-hPrP<sup>C</sup> transfected cells. One-sided T test comparing to an expected value of 100 (% hPrP<sup>C</sup> BA $\beta$ o or A $\beta$ o binding at 4°C). N = 3 - 4 experiments.
